# Supplementary material
Source: PubMed Central journal article supplement (PMC5446484)
Supplement: ajcr0007-1198-f6.pdf [file ajcr0007-1198-f6.pdf]

# Inhibition of HIF-1 $\alpha$ by PX-478 in ESCC

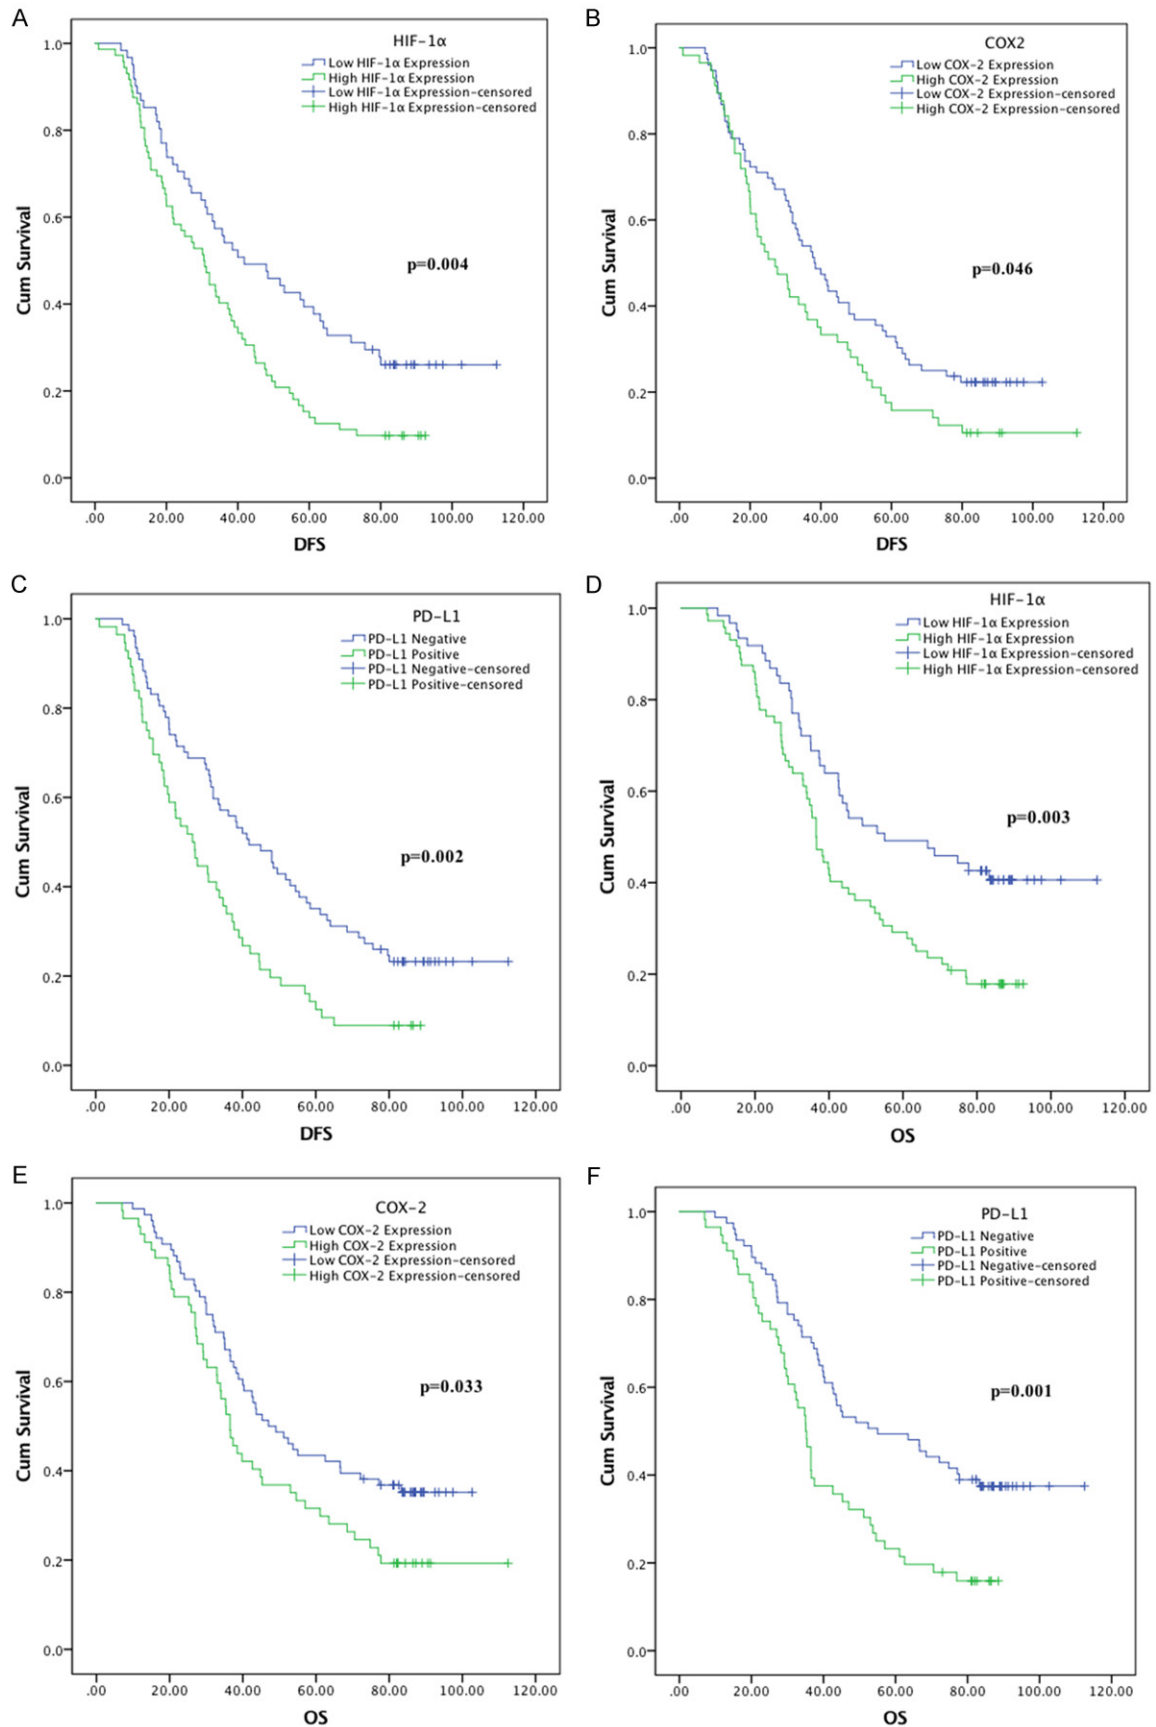

**Supplementary Figure 1.** Tumor HIF-1 $\alpha$ , COX-2 and PD-L1 expression in ESCC is correlated with worse disease-free survival (A-C) and overall survival (D-F).
